# Supplementary material for: Ser/Thr protein phosphatases in fungi: structure, regulation and function
Source: PubMed Central journal article supplement (PMC6506691; doi:10.15698/mic2019.05.677), 2019-04-24
Supplement: mic-06-217-s01.pdf [file mic-06-217-s01.pdf]

**Supplemental Table 1**

Protein sequences used for the construction of phylogenetic trees

| <b>PP1</b>  |                |
|-------------|----------------|
| Sp_PpZ      | sp P78968.1    |
| Cn_Ppz1     | XP_012047378.1 |
| Sc_Ppz2     | NP_010724      |
| Sc_Ppz1     | NP_013696.1    |
| Af_Ppz      | XP_749527.1    |
| Sc_Ppq1     | NP_015146.1    |
| Sp_Pp1-2    | sp P23880.1    |
| Sc_Glc7     | NP_011059.3    |
| Af_Pp1      | XP_750244.1    |
| Sp_Pp1-1    | sp P13681.1    |
| Cn_Pp1      | XP_012047402.1 |
| <b>PP2A</b> |                |
| Sp_Ppg      | sp Q10298.1    |
| Sc_Ppg1     | NP_014429.3    |
| Cn_Ppg1     | XP_012049795.1 |
| Af_Ppg1     | XP_753450.2    |
| Sc_Pph22    | NP_010093.1    |
| Sc_Pph21    | NP_010147.1    |
| Sp_Pp2a-2   | sp P23636.1    |
| Sp_Pp2a-1   | sp P23635.1    |
| Cn_Pph22    | XP_012049994.1 |
| Af_Pph21    | XP_750971.1    |
| Cn_Sit4     | XP_012048933.1 |
| Sp_Ppe1     | sp P36614.1    |
| Sc_Sit4     | NP_010236.1    |
| Af_SitA     | XP_751030.2    |
| Cn_Pph3     | XP_012046699.1 |
| Sp_Pph3     | sp O74789.1    |
| Af_Pp2a     | XP_753450.2    |
| Sc_Pph3     | NP_010360.1    |
| <b>PP2B</b> |                |
| Sc_Ppt1     | NP_011639.3    |
| Sp_Ppt1     | sp O43049.2    |
| Af_Ppt1     | XP_753963.1    |
| Cn_Ppt1     | XP_012052342.1 |
| Sc_Cmp2     | NP_013655.1    |
| Sc_Cna1     | NP_013537.1    |
| Sp_Pp2B     | sp Q12705.2    |
| Af_Pp2B     | XP_753703.1    |
| Cn_Cmp2     | XP_012052213.1 |

| <b>PP2C</b> |                |
|-------------|----------------|
| Af_Ptc7_2   | XP_750014.1    |
| Cn_Ptc7-2   | XP_012048589.1 |
| Sc_Ptc7     | NP_011943      |
| Sp_Azr1     | sp Q09189.3    |
| Cn_Ptc7-1   | XP_012051325.1 |
| Af_Ptc7_1   | XP_747265.1    |
| Cn_Ptc5     | XP_012046308.1 |
| Sc_Ptc5     | NP_014733.1    |
| Sp_Pp2c-5   | p O14189.4     |
| Af_Ptc5     | XP_750435.1    |
| Sc_Ptc1     | NP_010278.3    |
| Sp_Pp2c-1   | sp P40371.1    |
| Cn_Ptc1     | XP_012046759.1 |
| Af_Ptc1     | XP_753320.1    |
| Sc_Ptc4     | NP_009683      |
| Sc_Ptc2     | NP_011013.1    |
| Sc_Ptc3     | NP_009497.2    |
| Cn_Ptc3     | XP_012047784.1 |
| Af_Ptc2-1   | XP_752295.1    |
| Sp_Pp2c-3   | sp Q09173.1    |
| Sp_Pp2c-2   | sp Q09172.1    |
| Cn_Ptc6     | XP_012053325.1 |
| Sc_Ptc6     | NP_010003      |
| Sp_Pp2c-4   | sp O14156.2    |
| Af_Ptc6     | XP_752946.1    |
| Af_Ptc2-4   | XP_746384.1    |
| Af_Ptc2-3   | XP_753280.1    |
| Af_Ptc2-2   | XP_749521.1    |
